# Supplementary material
Source: Springer Nature journal article supplement (https://www.springermedizin.de/resource/supplementary/13058_2012_3169_MOESM5_ESM.pdf/9703428)

# 1. Genes

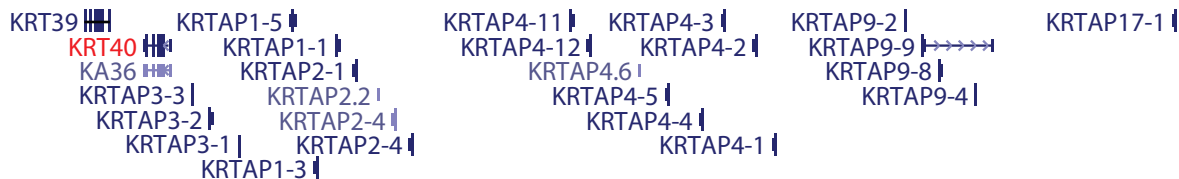

# 2. Duplications (Sequence homology > 90 %, size > 100bp)

(+) strand to (+) strand

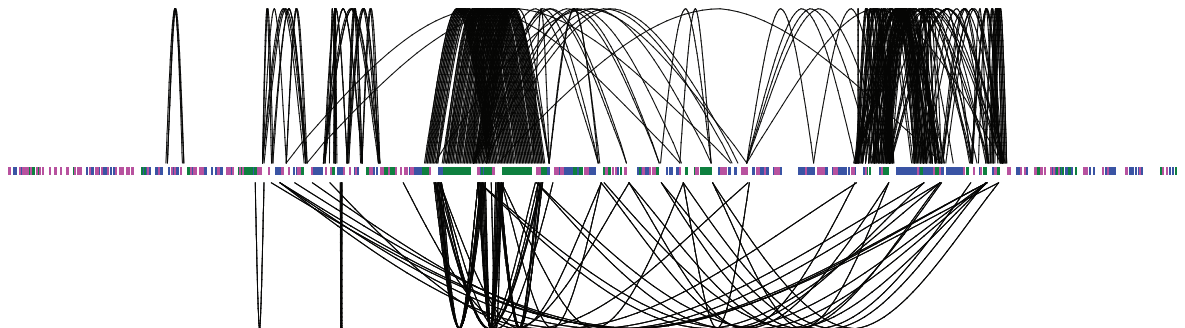

(+) strand to (-) strand

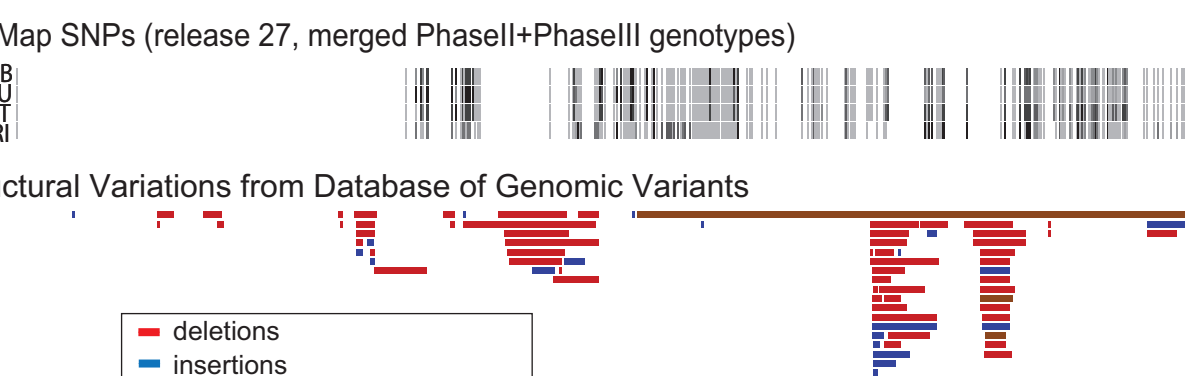

# 3. HapMap SNPs (release 27, merged PhaseII+PhaseIII genotypes)

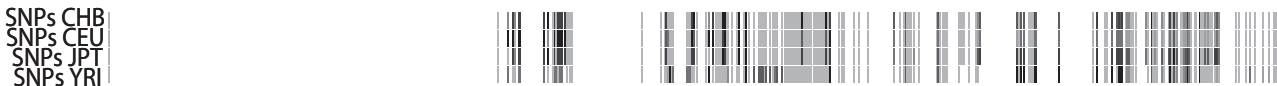

# 4. Structural Variations from Database of Genomic Variants

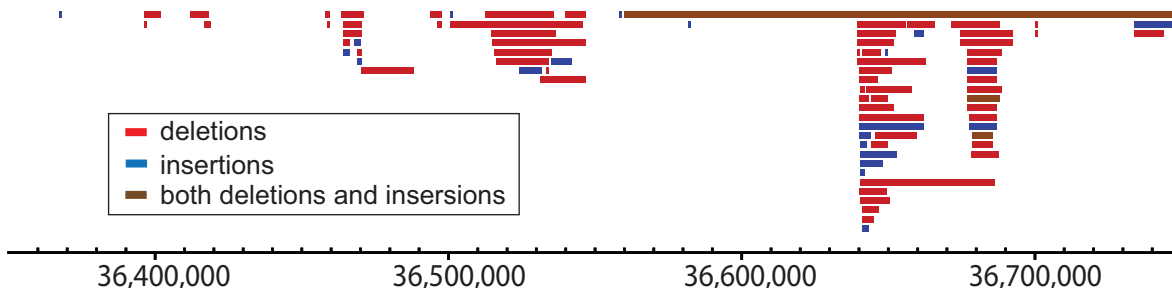

Supplement: MOESM5 [file 9703428]
